# Supplementary material for: Monitoring global protein thiol-oxidation and protein S-mycothiolation in Mycobacterium smegmatis under hypochlorite stress
Source: Sci Rep. 2017 Apr 26;7:1195. doi: 10.1038/s41598-017-01179-4 (PMC5430705; doi:10.1038/s41598-017-01179-4)
Supplement: Supplementary file 1 — Supplementary Figures and Tables [file 41598_2017_1179_MOESM1_ESM.pdf]

## Supplementary Information for

### Monitoring global protein thiol-oxidation and S-mycothiolation in *Mycobacterium smegmatis* under hypochlorite stress

Melanie Hillion<sup>1</sup>, Jörg Bernhardt<sup>2</sup>, Tobias Busche<sup>3</sup>, Martina Rossius<sup>1</sup>, Sandra Maaß<sup>2</sup>, Dörte Becher<sup>2</sup>, Mamta Rawat<sup>4</sup>, Markus Wirtz<sup>5</sup>, Rüdiger Hell<sup>5</sup>, Christian Rückert<sup>3,6</sup>, Jörn Kalinowski<sup>3</sup> and Haike Antelmann<sup>1\*</sup>

#### Departments & Institutions:

<sup>1</sup>*Institute for Biology-Microbiology, Freie Universität Berlin, D-14195 Berlin, Germany;*

<sup>2</sup>*Institute for Microbiology, Ernst-Moritz-Arndt-University of Greifswald, D-17487 Greifswald, Germany;*

<sup>3</sup>*Center for Biotechnology, Bielefeld University, D-33594 Bielefeld, Germany*

<sup>4</sup>*Department of Biology, California State University-Fresno, Fresno, CA 937401, United States*

<sup>5</sup>*Plant Molecular Biology, Centre for Organismal Studies Heidelberg, University of Heidelberg, Heidelberg, Germany*

<sup>6</sup>*Sinskey Lab, Department of Biology, Massachusetts Institute of Technology, Cambridge, MA, USA*

**Running title:** Protein thiol-oxidation and protein S-mycothiolation in *Mycobacterium smegmatis*

#### \*Corresponding author:

Haike Antelmann, Institute for Biology-Microbiology, Freie Universität Berlin,  
D-14195 Berlin, Germany, Tel.+49-30-838-51221, Fax.+49-30-838-451221,

**E-mail:** haike.antelmann@fu-berlin.de

### Supplementary Figure legends

**Figure S1. ClustalΩ sequence alignments of NaOCl-sensitive thiol-switches with increased thiol-oxidation and/or S-mycothiolations in NaOCl-treated *M. smegmatis* cells.** The alignments include redox-sensitive transcriptional regulators (RseA, RshA, IdeR, MSMEG\_4471, WhiB1/2), metabolic enzymes and ribosomal proteins, such as the myoinositol-phosphate synthase (Ino1), the IMP dehydrogenases (GuaB and GuaB2), the ribosomal protein (RpsM) and Zn-containing alcohol dehydrogenases (AdhB1/B2/E1/E2/C2/MSMEG\_1138, MSMEG\_3464, MSMEG\_4400, MSMEG\_1977). The alignments were performed using ClustalΩ (<http://www.ebi.ac.uk/Tools/msa/clustalo/>) and presented using Jalview (ver.2.9.0.b2). The purple color gradient indicates percentage of amino acid identity. Cysteine residues are marked in red and the oxidized Cys are bold-faced and marked with an asterisk (\*). The S-mycothiolated Cys is marked with “M”.

**(A)** The iron-dependent repressor IdeR of *M. smegmatis* was aligned with *M. tuberculosis* IdeR (Rv2711) and DtxR from *C. glutamicum* (Cg2103) and *C. diphtheriae* (DIP1414). The conserved single Cys102 is S-mycothiolated in *M. smegmatis* after NaOCl stress.

**(B)** The inositol-3-phosphate synthase (Ino1) of *M. smegmatis* was aligned with its homologs of *M. tuberculosis* (Rv0046c), *C. glutamicum* (Cgl2996) and *C. diphtheriae* (DIP0115). The conserved Cys18 was S-mycothiolated in *M. smegmatis* with a 6.3% oxidation increase under NaOCl stress. Ino1 of *C. glutamicum* was S-mycothiolated at Cys79.

**(C)** The inosine-5'-monophosphate dehydrogenases GuaB and GuaB2 of *M. smegmatis* were aligned with the GuaB homologs of *M. tuberculosis* and *C. glutamicum*. The active site Cys325 of GuaB and Cys302 of GuaB2 were identified as S-mycothiolated and with 19% and 33% increased oxidations, respectively, under NaOCl stress. This Cys form a thioimide intermediate during the catalysis and is one of the most conserved NaOCl-sensitive targets for S-thiolation across different bacteria.

**(D)** The Zn-containing alcohol dehydrogenases of *M. smegmatis* AdhB1/B2/E1/E2/C2, MSMEG\_3464, MSMEG\_4400, MSMEG\_1977 were aligned. Two catalytic Cys residues are

shown in red and the four Zn-binding Cys residues are labelled in blue. Interestingly, AdhE1 and MSMEG\_1977 were oxidized at their catalytic N-terminal Cys58 and Cys39, while AdhB1/B2/E2 and MSMEG\_1138 were all oxidized at one conserved Zn-binding Cys105, 106, 107 and 113.

**(E)** The ribosomal protein RpsM of *M. smegmatis* (MSMEG\_1521) was aligned with RpsM homologs of *M. tuberculosis* (Rv3460c), *C. glutamicum* (Cg0673) and *C. diphtheriae* (DIP0546). The single Cys86 is conserved and S-mycothiolated in both *M. smegmatis* and *C. glutamicum*, as well as S-cysteinylation in *M. smegmatis* and *C. glutamicum* mshC mutants. Cys86 showed a 21.8% oxidation increase in the *M. smegmatis* wild type under NaOCl stress.

**(F)** The anti-sigma factors RshA (MSMEG\_1915) and RseA (MSMEG\_5071) of *M. smegmatis* were aligned with their homologs of *M. tuberculosis* (Rv3221A and Rv1222 respectively) and *C. glutamicum* (Cg0877 and Cg1272). RseA showed 37.5% increased oxidation in the Zn-binding (ZAS) motif at Cys67 and Cys70 and RshA was 38.2% higher oxidized at the conserved Cys76 not present in the ZAS motif.

**(G)** The MarR-type transcriptional regulator MSMEG\_4471 of *M. smegmatis* was aligned with homologs of *M. tuberculosis* (Rv2327), *Rhodococcus equi* (REQ\_39840) and *Nocardia cyriacigeorgica* (NOCYR\_0508). Cys58 showed an 42.3 % oxidation increase in *M. smegmatis* wild-type strain under NaOCl stress.

**(H)** WhiB1 and WhiB2 of *M. smegmatis* (MSMEG\_1919 and MSMEG\_1831) were aligned with their homologs of *M. tuberculosis* (Rv3219 and Rv3260c) and *C. glutamicum* (Cg0878 and Cg0850). Conserved Cys residues of WhiB1 and WhiB2 coordinate an [4Fe-4S] cluster. The conserved Cys9 of WhiB1 and Cys67 of WhiB2 showed increased oxidation of 7.4% and 12.6%, respectively, under NaOCl stress.

Fig. S1A

|                           |     |                                                                       |     |
|---------------------------|-----|-----------------------------------------------------------------------|-----|
| M.smegmatis_IdeR/1-230    | 1   | MNDLVDTTEMYLRTIYDLEEEGVVPLRARIAERLDQSGPTVSQTVSRMERDGLLH               | 55  |
| M.tuberculosis_IdeR/1-230 | 1   | MNELVDTTEMYLRTIYDLEEEGVTPLRARIAERLDQSGPTVSQTVSRMERDGLLR               | 55  |
| C.diphtheriae_DtxR/1-226  | 1   | MKDLVDTTEMYLRTIYELEEEGVTPLRARIAERLEQSGPTVSQTVARMERDGLVV               | 55  |
| C.glutamicum_DtxR/1-228   | 1   | MKDLVDTTEMYLRTIYELEEEGIVPLRARIAERLEQSGPTVSQTVARMERDGLVH               | 55  |
| M.smegmatis_IdeR/1-230    | 56  | VAGDRHLELTDKGRALAVAVMRKHRLAERLLVDVIGLPWEDVHAEAC <sup>R</sup> RWEHVMSE | 110 |
| M.tuberculosis_IdeR/1-230 | 56  | VAGDRHLELTEKGRALAIIVMRKHRLAERLLVDVIGLPWEEVHAEACRWEHVMSE               | 110 |
| C.diphtheriae_DtxR/1-226  | 56  | VASDRSLQMTPTGRTLATAVMRKHRLAERLLTDIIGLDINKVHDEACRWEHVMSD               | 110 |
| C.glutamicum_DtxR/1-228   | 56  | VSPDRSLEMTPEGRSLAIAVMRKHRLAERLLTDIIGLDIHKVHDEACRWEHVMSD               | 110 |
| M.smegmatis_IdeR/1-230    | 111 | EVERRLVQVLNPTTSPFGNP I PGLTELGVTPGVNTEDVSLVRLTELPVGMPPAV              | 165 |
| M.tuberculosis_IdeR/1-230 | 111 | DVERRLVKVLNNPTTSPFGNP I PGLVELGVGPEPGADDANLVRLTELPAGSPVAV             | 165 |
| C.diphtheriae_DtxR/1-226  | 111 | EVERRLVKVLKDVSRSPFGNP I PGLDELGVGNSDA - -AVPGTRVIDAATSMPRKV           | 163 |
| C.glutamicum_DtxR/1-228   | 111 | EVERRLVEVLDDVHRSPFGNP I PGLGEIGLDQADE - -PDSGVRAIDLPLGENLKA           | 163 |
| M.smegmatis_IdeR/1-230    | 166 | VVRQLTEHVQGDIDLIGRLKEAGVVPNARVTVEANNNGGVMIVIPGHEQVELPHH               | 220 |
| M.tuberculosis_IdeR/1-230 | 166 | VVRQLTEHVQGDIDLITRLKDAGVVPNARVTVETTPGGGVTVIPGHENVTL PHE               | 220 |
| C.diphtheriae_DtxR/1-226  | 164 | RIVQINEIFQVETDQFTQLLDADIRVGSEVEIV - -DRDGHITLSHNGKDV ELIDD            | 216 |
| C.glutamicum_DtxR/1-228   | 164 | RIVQLNEILQVDLEQFQALTDAGVEIGTEVDII - -NEQGRVVITHNGSSVELIDD             | 216 |
| M.smegmatis_IdeR/1-230    | 221 | MAHAVKVEKV - -                                                        | 230 |
| M.tuberculosis_IdeR/1-230 | 221 | MAHAVKVEKV - -                                                        | 230 |
| C.diphtheriae_DtxR/1-226  | 217 | LAHTIRIEEL - -                                                        | 226 |
| C.glutamicum_DtxR/1-228   | 217 | L AHAVRVEKVEG                                                         | 228 |

Fig. S1B

|                             |     |           |           |   |   |   |   |   |   |   |   |   |   |   |   |   |   |   |   |   |   |   |   |   |   |   |   |   |   |   |   |   |   |   |   |   |   |   |   |   |   |   |   |    |   |    |   |    |     |     |   |   |   |   |   |     |     |
|-----------------------------|-----|-----------|-----------|---|---|---|---|---|---|---|---|---|---|---|---|---|---|---|---|---|---|---|---|---|---|---|---|---|---|---|---|---|---|---|---|---|---|---|---|---|---|---|---|----|---|----|---|----|-----|-----|---|---|---|---|---|-----|-----|
| M.smegmatis_Ino1/1-363      | 1   | - - - - - | MSEHAGE   | I | R | V | A | I | V | G | V | G | N | C | A | S | S | L | V | Q | G | V | Q | Y | Y | R | N | A | D | E | N | T | T | V | P | G | L | M | H | V | K | F | G | 47 |   |    |   |    |     |     |   |   |   |   |   |     |     |
| M.tuberculosis_Ino1/1-367   | 1   | M         | S         | E | H | Q | S | L | P | A | P | E | A | S | T | E | V | R | V | A | I | V | G | V | G | N | C | A | S | S | L | V | Q | G | V | E | Y | Y | N | A | D | D | T | S  | T | V  | P | G  | L   | M   | H | V | R | F | G | 55  |     |
| C.diphtheriae_DIP0115/1-355 | 1   | - - - - - | - - - - - | M | S | A | I | R | V | A | I | A | G | V | G | N | C | A | S | S | L | V | Q | G | V | E | Y | K | D | A | S | P | D | Q | Q | V | P | G | L | M | H | V | Q | F  | G | 43 |   |    |     |     |   |   |   |   |   |     |     |
| C.glutamicum_Cgl2996/1-363  | 1   | - - - - - | - - - - - | M | S | T | S | T | I | R | V | A | I | A | G | V | G | N | C | A | T | S | L | I | Q | G | V | E | Y | R | N | A | D | P | S | E | T | V | P | G | L | M | H | V  | K | F  | G | 45 |     |     |   |   |   |   |   |     |     |
| M.smegmatis_Ino1/1-363      | 48  | P         | Y         | H | V | R | D | V | N | F | V | A | A | F | D | V | D | A | K | K | V | G | F | D | L | S | E | A | I | F | A | S | E | N | N | T | I | K | I | A | D | V | P | P  | T | D  | V | I  | V   | Q   | R | G | P | T | L | D   | 102 |
| M.tuberculosis_Ino1/1-367   | 56  | P         | Y         | H | V | R | D | V | K | F | V | A | A | F | D | V | D | A | K | K | V | G | F | D | L | S | D | A | I | F | A | S | E | N | N | T | I | K | I | A | D | V | A | P  | T | N  | V | I  | V   | Q   | R | G | P | T | L | D   | 110 |
| C.diphtheriae_DIP0115/1-355 | 44  | D         | Y         | H | V | G | D | I | E | F | V | A | A | F | D | V | D | R | A | K | V | G | L | D | L | S | E | A | I | N | A | S | E | N | C | T | I | R | I | C | D | V | P | E  | T | G  | V | T  | V   | Q   | R | G | P | T | L | D   | 98  |
| C.glutamicum_Cgl2996/1-363  | 46  | D         | Y         | H | V | G | D | I | E | F | V | A | A | F | D | V | D | A | E | K | V | G | I | D | L | A | D | A | T | E | A | S | Q | N | C | T | I | K | I | A | D | V | P | Q  | T | G  | I | N  | V   | L   | R | G | P | T | L | D   | 100 |
| M.smegmatis_Ino1/1-363      | 103 | G         | I         | G | K | Y | A | D | T | I | E | V | S | D | A | E | P | V | D | V | V | K | V | L | K | E | A | E | V | D | V | L | V | S | Y | L | P | V | G | S | E | E | A | D  | K | F  | Y | A  | Q   | C   | A | I | D | A | G | 157 |     |
| M.tuberculosis_Ino1/1-367   | 111 | G         | I         | G | K | Y | A | D | T | I | E | L | S | D | A | E | P | V | D | V | V | Q | A | L | K | E | A | K | V | D | V | L | V | S | Y | L | P | V | G | S | E | E | A | D  | K | F  | Y | A  | Q   | C   | A | I | D | A | G | 165 |     |
| C.diphtheriae_DIP0115/1-355 | 99  | G         | L         | G | K | Y | R | A | T | V | E | E | S | P | A | Q | A | V | D | V | V | Q | V | L | K | D | E | R | V | D | V | L | V | S | Y | L | P | V | G | S | E | E | A | D  | K | F  | Y | A  | Q   | C   | A | I | D | A | N | 153 |     |
| C.glutamicum_Cgl2996/1-363  | 101 | G         | L         | G | D | H | Y | R | A | T | I | D | E | S | T | A | E | P | V | D | V | V | Q | A | L | I | D | A | K | A | D | V | L | V | S | Y | L | P | V | G | S | E | E | A  | D | K  | F | Y  | A   | Q   | A | A | I | D | A | G   | 155 |
| M.smegmatis_Ino1/1-363      | 158 | V         | A         | F | V | N | A | L | P | V | F | I | A | S | D | P | V | W | A | K | K | F | E | D | A | G | V | P | I | V | G | D | I | K | S | Q | V | G | A | T | I | T | H | R  | V | M  | A | K  | L   | F   | E | D | R | G | V | 212 |     |
| M.tuberculosis_Ino1/1-367   | 166 | V         | A         | F | V | N | A | L | P | V | F | I | A | S | D | P | V | W | A | K | K | F | T | D | A | R | V | P | I | V | G | D | I | K | S | Q | V | G | A | T | I | T | H | R  | V | L  | A | K  | L   | F   | E | D | R | G | V | 220 |     |
| C.diphtheriae_DIP0115/1-355 | 154 | V         | A         | F | V | N | A | L | P | V | F | I | A | S | D | P | Q | W | A | A | K | F | E | E | A | G | V | P | I | V | G | D | I | K | S | Q | V | G | A | T | I | T | H | R  | V | L  | A | K  | L   | F   | E | D | R | G | V | 208 |     |
| C.glutamicum_Cgl2996/1-363  | 156 | C         | A         | F | V | N | A | L | P | V | F | I | A | S | D | P | E | W | A | K | K | F | T | D | A | G | I | P | I | V | G | D | I | K | S | Q | I | G | A | T | I | T | H | R  | V | L  | A | R  | L   | F   | E | E | R | G | V | 210 |     |
| M.smegmatis_Ino1/1-363      | 213 | T         | L         | D | R | T | Y | Q | L | N | V | G | G | N | M | D | F | L | N | M | L | E | R | S | R | L | E | S | K | K | V | S | K | T | Q | A | V | T | S | N | L | S | - | G  | A | L  | A | G  | K   | V   | E | D | K | N | V | H   | 266 |
| M.tuberculosis_Ino1/1-367   | 221 | Q         | L         | D | R | T | M | Q | L | N | V | G | G | N | M | D | F | L | N | M | L | E | R | E | R | L | E | S | K | K | I | S | K | T | Q | A | V | T | S | N | L | K | - | R  | - | -  | - | E  | F   | K   | T | K | D | V | H | 270 |     |
| C.diphtheriae_DIP0115/1-355 | 209 | H         | L         | D | R | T | M | Q | L | N | V | G | G | N | M | D | F | K | N | M | L | E | R | E | R | L | E | S | K | K | I | S | K | T | Q | A | V | T | S | N | L | D | - | Q  | - | -  | - | E  | I   | A   | A | R | D | V | H | 258 |     |
| C.glutamicum_Cgl2996/1-363  | 211 | R         | V         | D | R | T | M | Q | L | N | V | G | G | N | M | D | F | K | N | M | L | D | R | N | R | L | E | S | K | K | V | S | K | T | Q | A | V | T | S | N | I | P | D | G  | P | L  | S | G  | K   | V   | E | D | R | N | V | H   | 265 |
| M.smegmatis_Ino1/1-363      | 267 | I         | G         | P | S | D | H | V | A | W | L | D | D | R | K | W | A | Y | V | R | L | E | G | R | A | F | G | D | V | P | L | N | L | E | Y | K | L | E | V | W | D | S | P | N  | S | A  | G | V  | I   | I   | D | A | V | R | A | A   | 321 |
| M.tuberculosis_Ino1/1-367   | 271 | I         | G         | P | S | D | H | V | G | W | L | D | D | R | K | W | A | Y | V | R | L | E | G | R | A | F | G | D | V | P | L | N | L | E | Y | K | L | E | V | W | D | S | P | N  | S | A  | G | V  | I   | I   | D | A | V | R | A | A   | 325 |
| C.diphtheriae_DIP0115/1-355 | 259 | I         | G         | P | S | D | Y | V | G | W | L | D | D | R | K | W | A | Y | V | R | L | E | G | T | A | F | G | D | V | P | L | N | L | E | Y | K | L | E | V | W | D | S | P | N  | S | A  | G | I  | I   | I   | D | A | L | R | A | A   | 313 |
| C.glutamicum_Cgl2996/1-363  | 266 | I         | G         | P | S | D | H | V | Q | W | L | D | D | R | K | W | A | Y | V | R | L | E | G | T | A | F | G | G | V | P | L | N | L | E | Y | K | L | E | V | W | D | S | P | N  | S | A  | G | I  | I   | I   | D | A | V | R | A | A   | 320 |
| M.smegmatis_Ino1/1-363      | 322 | K         | I         | A | K | D | R | G | I | G | G | P | I | E | A | A | S | A | Y | L | M | K | S | P | P | K | Q | L | A | D | D | V | A | R | A | E | L | E | T | F | I | E | G | -  | - | -  | - | -  | 363 |     |   |   |   |   |   |     |     |
| M.tuberculosis_Ino1/1-367   | 326 | K         | I         | A | K | D | R | G | I | G | G | P | V | I | P | A | S | A | Y | L | M | K | S | P | P | E | Q | L | P | D | D | I | A | R | A | Q | L | E | E | F | I | I | G | -  | - | -  | - | -  | 367 |     |   |   |   |   |   |     |     |
| C.diphtheriae_DIP0115/1-355 | 314 | K         | I         | A | K | D | R | G | I | G | G | P | V | Y | P | A | A | A | Y | L | M | K | S | P | P | R | Q | M | R | D | E | A | A | R | A | E | L | E | Q | F | I | S | G | -  | - | -  | - | -  | 355 |     |   |   |   |   |   |     |     |
| C.glutamicum_Cgl2996/1-363  | 321 | K         | I         | A | L | D | R | G | I | G | G | P | I | M | P | A | S | S | Y | L | M | K | S | P | P | E | Q | L | P | D | D | V | A | R | E | R | L | E | A | F | I | I | E | A  | - | -  | - | -  | -   | 363 |   |   |   |   |   |     |     |

Fig. S1C

|                            |     |                                                         |     |
|----------------------------|-----|---------------------------------------------------------|-----|
| M.smegmatis_GuaB/1-513     | 1   | -----MSIAESSVPIAVPVPTGGDDPTKVAMLG                       | 39  |
| M.smegmatis_GuaB2/1-478    | 1   | -----M-----RFL-DG----HTPAYDLTYNDVFVVP                   | 23  |
| M.tuberculosis_GuaB1/1-479 | 1   | -----MM-----RFL-DG----HPPGYDLYNDVFI                     | 24  |
| M.tuberculosis_GuaB2/1-529 | 1   | MSRGMGLEDDSDLVVSPYVRMGGLTDPVPTGGDDPHKVAMLG              | 55  |
| C.glutamicum_GuaB1/1-477   | 1   | -----M-----RFL-NN----SNPPYELTYSDVFMVPS                  | 23  |
| C.glutamicum_GuaB2/1-506   | 1   | -----MTTQSRVSTGGDNPKNVALVG                              | 32  |
| M.smegmatis_GuaB/1-513     | 40  | ASDVVPATADTSSQLTKRIRLVP                                 | 94  |
| M.smegmatis_GuaB2/1-478    | 24  | RSDVASRF-DVDLSTVDGSGTTIPVVVANMTAVAGRRMAETVARRGGIVVL     | 77  |
| M.tuberculosis_GuaB1/1-479 | 25  | RSEVASRF-DVDLSTADGSGTTIPVVVANMTAVAGRRMAETVARRGGIVVL     | 78  |
| M.tuberculosis_GuaB2/1-529 | 56  | ASDVVPATADTSSQLTKKIRLKV                                 | 110 |
| C.glutamicum_GuaB1/1-477   | 24  | RSDVGSRM-SVDLRTNDGTGTTIPVVVANMTAVAGRRMAETIARRGGMAILL    | 77  |
| C.glutamicum_GuaB2/1-506   | 33  | ASDVVPSEVDTSQTLTRNIRLNT                                 | 87  |
| M.smegmatis_GuaB/1-513     | 95  | PVAEQAGQVETVKRSEAGMVTDPVTC                              | 149 |
| M.smegmatis_GuaB2/1-478    | 78  | PITAVSETVDFVKSRD-LVVDTPVTLSPEDSVSDANALLH-KRAHGAAVVFEGR  | 130 |
| M.tuberculosis_GuaB1/1-479 | 79  | PIPAVKQTVAFVKSRD-LVLDTPVTLSPEDSVSDANALLH-KRAHGAAVVFEGR  | 131 |
| M.tuberculosis_GuaB2/1-529 | 111 | PVAEQAGQVEMVKRSEAGMVTDPVTC                              | 165 |
| C.glutamicum_GuaB1/1-477   | 78  | PADIAAETIANVKKAD-LVFDTPITIKPHHTVGYARNLIH-KRAHGAAVVFEGDQ | 130 |
| C.glutamicum_GuaB2/1-506   | 88  | SIQEQAENVELVKRSESGMVTDPVTC                              | 142 |
| M.smegmatis_GuaB/1-513     | 150 | LVGLITNRDMRFEVDQSKP                                     | 204 |
| M.smegmatis_GuaB2/1-478    | 131 | PICLVTEANCAG-VDRFARVRIA-LSDFTVAPVGTDPREVFDLLEHAPIDVAV   | 183 |
| M.tuberculosis_GuaB1/1-479 | 132 | PICLVRESSECLG-VDRFTRVRIA-VTDYVTPAGTEPRKIFDLLEHAPVDVAV   | 184 |
| M.tuberculosis_GuaB2/1-529 | 166 | LVGLITNRDMRFEVDQSKQAEVMTKAPLITAEQEGVSASAAALGLLRN        | 220 |
| C.glutamicum_GuaB1/1-477   | 131 | PVGIVTDKDL EG-ADNFTQVGTLM-STSLLTLPEDISPEDAFGILHEHSRKLAP | 183 |
| C.glutamicum_GuaB2/1-506   | 143 | LVGLITNRDMRFESIMNRRAEVMTMPMLVVAEEGVTKQALALSANKVEKLPI    | 197 |
| M.smegmatis_GuaB/1-513     | 205 | VDGHGKLTGLITVKDFVKTEQFPLSTKDSGRLLVGAAVGVGDDAWTRAMT      | 259 |
| M.smegmatis_GuaB2/1-478    | 184 | TAPDGTLAGVLTRTGAIRAGIYT-PAVDAKGRRLRIAAVGVINGDVGAQAQALAE | 237 |
| M.tuberculosis_GuaB1/1-479 | 185 | TDADGTLAGVLSRTGAIRAGIYT-PATDSAGRLRIGAAVGVINGDVGAQAQALAE | 238 |
| M.tuberculosis_GuaB2/1-529 | 221 | VDGRGRLTGLITVKDFVKTEQHPPLATKDSGRLLVGAAVGVGDDAWTRAMML    | 275 |
| C.glutamicum_GuaB1/1-477   | 184 | VAADGSLRGILTRTGALRATMYK-PAIDANGRLRVGAAGVINGDIEGRTKTL    | 237 |
| C.glutamicum_GuaB2/1-506   | 198 | IAKDGLVGLITVKDFVKTEQHPNASKDASGRLLVAAIGTGEESFQRAGAL      | 252 |
| M.smegmatis_GuaB/1-513     | 260 | GVDVLIVDTAHAHNRGVLDMVSRCLKAVGERVDVVGGNVATRAAAALVEAGADA  | 314 |
| M.smegmatis_GuaB2/1-478    | 238 | GADLLVIDTAHGHQAAMLDIAIKAVA-SLDLGLPLVAGNVSAEGTRDLEAGASI  | 291 |
| M.tuberculosis_GuaB1/1-479 | 239 | GVDVLVIDTAHGHQVKTDAIKAVS-ALDLGLPLVAGNVSAEGTRDLEKAGANV   | 292 |
| M.tuberculosis_GuaB2/1-529 | 276 | GVDVLVVDTAHAHNRVLDMVGKLVSEVGRVVEVGGNVATRAAAALVDAAGADA   | 330 |
| C.glutamicum_GuaB1/1-477   | 238 | GADVLVVDTAHGHQSTMISALKRIR-ALDVNVPVAGNVVATDGVDRDLVEAGANI | 291 |
| C.glutamicum_GuaB2/1-506   | 253 | GVDILVVDSAHAHNRGVLDMVSRVKKSF-PKVDIVGGLNATREAAQAMIEAGADA | 306 |
| M.smegmatis_GuaB/1-513     | 315 | VKVGVGPGSIC                                             | 369 |
| M.smegmatis_GuaB2/1-478    | 292 | VKVGVGPGAMC                                             | 346 |
| M.tuberculosis_GuaB1/1-479 | 293 | VKVGVGPGAMC                                             | 347 |
| M.tuberculosis_GuaB2/1-529 | 331 | VKVGVGPGSIC                                             | 385 |
| C.glutamicum_GuaB1/1-477   | 292 | VKVGVGPGAMC                                             | 346 |
| C.glutamicum_GuaB2/1-506   | 307 | IKVGIGPGSIC                                             | 361 |
| M.smegmatis_GuaB/1-513     | 370 | ALAAGASTAMLGSLLAGTAE                                    | 420 |
| M.smegmatis_GuaB2/1-478    | 347 | ALAAGASNVMIGSWFAGTYE                                    | 401 |
| M.tuberculosis_GuaB1/1-479 | 348 | ALAAGASNVMIGSWFAGTYE                                    | 402 |
| M.tuberculosis_GuaB2/1-529 | 386 | ALAAGASTAMLGSLLAGTAE                                    | 436 |
| C.glutamicum_GuaB1/1-477   | 347 | ALAAGASNVMVGSWFSGTYE                                    | 401 |
| C.glutamicum_GuaB2/1-506   | 362 | ALAAGASNVMVGSWFSGTYE                                    | 415 |
| M.smegmatis_GuaB/1-513     | 421 | KSYSKDRY                                                | 475 |
| M.smegmatis_GuaB2/1-478    | 402 | FDRARKGL                                                | 449 |
| M.tuberculosis_GuaB1/1-479 | 403 | FDRARKAL                                                | 450 |
| M.tuberculosis_GuaB2/1-529 | 437 | TSYSKDRY                                                | 491 |
| C.glutamicum_GuaB1/1-477   | 402 | FEKARRAM                                                | 449 |
| C.glutamicum_GuaB2/1-506   | 416 | RSYSKDRY                                                | 470 |
| M.smegmatis_GuaB/1-513     | 476 | TEQLQQAQFVQIT-AAGLKE                                    | 513 |
| M.smegmatis_GuaB2/1-478    | 450 | NLPHELHEKVVLGVQSAAGFAEGHPLPAGW                          | 478 |
| M.tuberculosis_GuaB1/1-479 | 451 | NLAELHERAVVGVQSGAAGFAEGHPLPAGW                          | 479 |
| M.tuberculosis_GuaB2/1-529 | 492 | TEVLQQAQFVRIT-PAGLKE                                    | 529 |
| C.glutamicum_GuaB1/1-477   | 450 | SIETFFERATVGVQSTEGYAE                                   | 477 |
| C.glutamicum_GuaB2/1-506   | 471 | TEELHNARFVQIT-SAGLKE                                    | 506 |

### Fig. S1D

|                        | 10                                                                | 20 | 30 | 40 | 50 |  |
|------------------------|-------------------------------------------------------------------|----|----|----|----|--|
| MSMEG_0127_adhE1/1-363 | 1 MKIRGAVLER - - IGAPRPYAESRPLT I SELDLADP - GPDELLVRIESAGL       | C  | H  | 50 |    |  |
| MSMEG_0217_adhB1/-374  | 1 MKTKGAL - - - - - LWELNSPFKVDIEIDLGP - VADEVQIRLHAAGM           | C  | H  | 42 |    |  |
| MSMEG_1138/1-378       | 1 MPAPDTRIHP - - STSIRAAVFDGTI SVPEVDLADP - RGPGEVRVKIAAAGV       | C  | H  | 50 |    |  |
| MSMEG_2317_adhC2/1-349 | 1 MST - - - - - VSAAYATSATEPLTKTTITRRAV - GPDHVAFDIHFAGI          | C  | H  | 43 |    |  |
| MSMEG_3464/1-338       | 1 MPT - - - - - HRAVHVKSTGGTLELDVETPPP - DRGQVRIDVAACGV           | C  | G  | 43 |    |  |
| MSMEG_4340_adhE2/1-363 | 1 - - - MPQTVRGV - - I - - - - SRSKQPVELVDIVIPDP - GPGEVVVDIIACGV | C  | H  | 44 |    |  |
| MSMEG_5866_adhB2/1-375 | 1 MKTKGAL - - - - - IWEFNQPWVSIEEIIIGDP - VKDEVQIQMEASGM          | C  | H  | 42 |    |  |
| MSMEG_4400/1-356       | 1 MEENATTFTELSTHRAAIVRGGGDVVIESVLPVL - QTGFVLVRYRLATV             | C  | G  | 52 |    |  |
| MSMEG_1977/1-341       | 1 - - - - - MRAVQVVGVHQNLEADVEKPTPTGPFDVVVKIGGAGV                 | C  | S  | 41 |    |  |

|                        |    | 60   | 70             | 80  | 90  | 100    |                    |           |    |             |     |
|------------------------|----|------|----------------|-----|-----|--------|--------------------|-----------|----|-------------|-----|
| MSMEG_0127_adhE1/1-363 | 51 | DL   | SVDVDGNRVR     | --- | PL  | PMLLG  | HEAGGVVETPGA       | -----     | DL | ETGQRRVM    | 90  |
| MSMEG_0217_adhB1-374   | 43 | DYH  | ITTGATPI       | --- | GL  | PALGG  | HEGAGVVTYKVGKNTV   | -----     | G  | I EEGDHVIL  | 85  |
| MSMEG_1138/1-378       | 51 | DL   | HTVTGAWDV      | --- | PA  | PVVLG  | HEGSGVVTVAEGEVD    | -----     | DL | EPGDHVVIL   | 93  |
| MSMEG_2317_adhC2/1-349 | 44 | D    | IHTVKA EWGVP   | --- | NP  | PVVPGE | HE IAGVVTVEGSEV    | -----     | Y  | KYKVGDRVGV  | 87  |
| MSMEG_3464/1-338       | 44 | DRG  | I VNGVFPVA     | --- | SW  | PVTPGE | HE IAGTVAE IGPGE   | VE-----   | D  | FAVGD RVAI  | 87  |
| MSMEG_4340_adhE2/1-363 | 45 | DL   | T YREGI ND     | --- | EF  | PFLLG  | HEAGTVEA VEGEVT    | -----     | N  | VAPGDFVIL   | 87  |
| MSMEG_5866_adhB2-375   | 44 | DHHL | VTGGI PMG      | --- | G   | PVLGG  | HEAGT I VTEVPGVE   | -----     | G  | I EPGDHHVIL | 86  |
| MSMEG_4400/1-356       | 53 | DRHT | VTGRRPQ        | --- | P   | PSVTLG | HEATVEG I VSGDGEPL | AVDGNPL   | L  | GKGRVVV     | 100 |
| MSMEG_1977/1-341       | 42 | DLH  | I LEGQWAEKSQVL | PT  | LYG | I      | HENAGWVESVGS       | SAVT----- | N  | VTGDKRVI    | 88  |

|                        | 110                    | 120                     | 130                                     | 140                         | 150 |
|------------------------|------------------------|-------------------------|-----------------------------------------|-----------------------------|-----|
| MSMEG_0127_adhE1/1-363 | 91 T F - L P R G S C   | P A C T D G L T P C     | G P G S - V A N G A G T L M N G D I R   | L R R D G S E P V F H L G   | 141 |
| MSMEG_0217_adhB1/1-374 | 86 A F - I P A C G C   | P P L K G F R S L C     | D R G A V L L - G G K A I A D G T S R I | H A G S H E V S P M N L     | 130 |
| MSMEG_1138/1-378       | 94 S W - V P G C G E   | C N K C A G R P A C     | S L V A S V A V K G T L Y D G T T R L S | N E R G T V H Y H L G       | 141 |
| MSMEG_2317_adhC2/1-349 | 88 G C F V D S C R E   | D Y C K A G L E Q Y C   | T G T G M V G - T Y N - - - - -         | A I D R - - - - - D G T P T | 121 |
| MSMEG_3464/1-338       | 88 G W F G G H C G T   | C V P C R K G L F I H C | V N G Q V P - - - - -                   | - - - - - S L S Y           | 118 |
| MSMEG_3434_adhE2/1-363 | 88 N W - R A V G C G C | R A C K R G R P L C     | F D T F N A T - Q K M T L D G - - - - - | - - - - - T E L T P A L G   | 130 |
| MSMEG_5886_adhB2/1-375 | 87 S F - I P S C G S   | C P S C A G R L N L C   | D L G A L L - G G V A A D G T H R I     | H A N G K P V P M T L       | 131 |
| MSMEG_4400/1-356       | 102 S V - L T P C G T  | C D R C V A G V A T K C | R T L R K A - G H E - - - - -           | - - - - - S L Y S A W P L   | 131 |
| MSMEG_1977/1-341       | 89 H P - L I T C G L   | C A C R S G D D V H C   | E S N A P K - - - - -                   | - - - - - G I D T           | 118 |

|                        | 160 | 170               | 180          | 190         | 200             | 210               |
|------------------------|-----|-------------------|--------------|-------------|-----------------|-------------------|
| MSMEG_0127_adhE1/1-363 | 142 | VSGFATHAVVDDRSI   | VVPVDPDPVATV | -AALLG      | CAVL            | TGGGAVLNVGRPKPGQT |
| MSMEG_0217_adhB/1-374  | 137 | LGTFAPYMTVHKDSV   | VKIDKIPFET   | -AAIMG      | CAVPTGFGSATNV   | QAQVQAGET         |
| MSMEG_1138/1-378       | 146 | VSSYAEQVVVPRNGA   | IKVRKDAPLED  | -IAIVG      | CAIATGVGAVRNTA  | GVFEPGST          |
| MSMEG_2317_adhC2/1-349 | 128 | HGGYSGAIVVDENVY   | LRI PDSLPLDA | -AAPLL      | CAGITTY         | -SPLRHNWAGPGKK    |
| MSMEG_3464/1-338       | 119 | PGGYAESVTPANAL    | ARIPDEL SFVE | -AAPMG      | CAGVTTY         | -NALRHTRAVAGDV    |
| MSMEG_4340_adhE2/1-363 | 131 | IGAFADKTLVHEGQK   | TKVDADADPAV  | -AGLLG      | CGVMAG          | IGAAI NTGAVTRDDT  |
| MSMEG_5866_adhB2/1-375 | 138 | LGTFSPMYVHKSSV    | VKIDKIPFEV   | -ALVCG      | VTTGTYGSAVRSGDI | IRPGDD            |
| MSMEG_4400/1-356       | 139 | SGGYAEHYLVPRGMP   | VAVVADDIADAL | AADACATATVM | -AVIERAL        | PVGGRR            |
| MSMEG_1977/1-341       | 139 | SGGYAEHYLVKTSARSV | VKIDDELADPAV | AALADAGAL   | ATAYHAAKAAARL   | TPRDR             |

|                        | 220 | 230                       | 240            | 250                   | 260             |     |
|------------------------|-----|---------------------------|----------------|-----------------------|-----------------|-----|
| MSMEG_0127_adhE1/1-363 | 194 | VVVVGLGGVGMAAL            | TALAHDDVRVVQDL | SDKLRAAELGVHET        | FTEPQAA         | 246 |
| MSMEG_0217_adhB1/3-74  | 189 | V I I VGVGGIGMSAL         | QGAVISGAQKVIA  | IDPNEWKRQAVKFG        | ATHVYPT-MAE     | 240 |
| MSMEG_1138/1-378       | 198 | VAVIGGGVGLAG              | VQVGRALAGASR   | IVAVDVAAEKEL          | ARKLGATDAVASDAT | 250 |
| MSMEG_2317_adhC2/1-349 | 179 | VAVIGLGGGLGHVAK           | LKAMGADVDTVL   | QSCLKMED-GLRL         | GASAYYATSDPE    | 230 |
| MSMEG_3464/1-338       | 170 | V A I G L G G L G H L G V | QAAFMGDTFTV    | IARGRDREQDARAL        | GARHYIDSTSD     | 222 |
| MSMEG_4340_adhE2/1-363 | 183 | VAVIGGGVGLGDA             | IAAGALVGAKKI   | IAYDMNKKLDWARE        | FEGATHVTNAKDL   | 235 |
| MSMEG_5866_adhB2/1-375 | 190 | V A I F G I G G V G M G   | ALQAVGNAGARY   | I F A I D P V E W K R | DQALKFGATHVY    | 241 |
| MSMEG_4400/1-356       | 191 | VVVIGAGMLGLT              | LALAAADLGASTV  | ADPSPAERLEIAAH        | FGAEVTAES- -    | 241 |
| MSMEG_1177/1-341       | 172 | VVVIGAGGLGHIG             | IQVLKALSPAE    | IVDNRNPEALKL          | EAGDHCIVIA-DGN  | 223 |

|                        | 270 | 280                                                       | 290                                             | 300                             | 310                     |           |
|------------------------|-----|-----------------------------------------------------------|-------------------------------------------------|---------------------------------|-------------------------|-----------|
| MSMEG_0127_adhE1/1-363 | 247 | -- -- -- -- --                                            | DLRAEVV IEAAGHP                                 | - AAL ETA IGLTGP                | GGRT I TVGL PR          | - PDA 286 |
| MSMEG_0217_adhB1/374   | 244 | A I A P V I D V T H G L M A D K V I I                     | A V G E M K G Y I                               | E E A L I T A K T G T           | G V V T G M G A M T D V | 293       |
| MSMEG_1138/1-378       | 251 | D V A A M R E V L P G D Y V D F A I G K I                 | - A T T E Q A I                                 | A A L G L G G A A V I V G L P R | - Q G E 300             |           |
| MSMEG_2317_adhC2/1-349 | 231 | T F D - - K - L A G S F D L I N T V S A N                 | - L D L G A Y L G L K L D G A L V G L G P E     | - - H 273                       |                         |           |
| MSMEG_3464/1-338       | 223 | V A A - - A L Q D L G G A A V V L G T A G N S             | - Q A M A D T I G L G A P R G E L V A V G S A   | - - E 287                       |                         |           |
| MSMEG_4340_adhE2/1-363 | 236 | A V E T I Q D L T D G F G A D V I D A V G R P             | - E T W K Q A F Y A R D L A G T V V L G V G P T | - P D M 265                     |                         |           |
| MSMEG_5866_adhB2/1-375 | 242 | A M A G I A E V T A G G M A K K V I V T V G E L H G E D I | D N Y L N V T S K G G T                         | G V V T A V G S M L D T         | 294                     |           |
| MSMEG_4400/1-356       | 242 | Q - - - - - I E E G D V L L E F S G K S                   | - A A L Q A G L R T L D V S G V A F V A G S A   | - P D G 282                     |                         |           |
| MSMEG_1977/1-341       | 224 | E I E Q V R D L T G G H G A E T V F G V G E G             | - G A T S E I A M L R R A G D Y H V G V G Y E   | - - 270                         |                         |           |

|                        | 320 | 330                                                                                                       | 340 | 350 | 360 |  |
|------------------------|-----|-----------------------------------------------------------------------------------------------------------|-----|-----|-----|--|
| MSMEG_0127_adhE1/1-363 | 287 | R I T V S P L G F V A E G R S L I G S Y L G S A V P S R D I P R F V E L - W R A G R L P V E S L V S S T I | 338 |     |     |  |
| MSMEG_0217_adhB1/1-374 | 294 | D V K L N L F L F T M L Q K T L K G N I F G G S S H I E T P R A A L - Y K S G L L N I D M V T R T Y       | 345 |     |     |  |
| MSMEG_1138/1-374       | 301 | R A S F D P L T L A E A D R I L G S N Y G S A V P E R D I P A L V D E - V M A G N L D L A S M I S G R R   | 352 |     |     |  |
| MSMEG_2317_adhC2/1-349 | 274 | P M E V P A F P L L A Q R R N L T G S M I G G I P E T Q E M L D F C A E - - H D V R - - - P E I E I I     | 319 |     |     |  |
| MSMEG_3464/1-338       | 268 | P L G V S P A Q L I Q P A V S I S G H P S G T A R E V E T M H F A V V - - A G V R - - - A R V E E R       | 313 |     |     |  |
| MSMEG_4340_adhE2/1-363 | 286 | K L E M P L I D F F S R G G S L K S W Y G D L P R D P F T I S L - Y L Q G R L P L E K F V S E R I         | 337 |     |     |  |
| MSMEG_5866_adhB2/1-375 | 295 | N A N I N L A M L T L Q K N L Q G T I F G G N P P H D I P Q L L S M - Y K A G K L N L D M V T R Q Y       | 346 |     |     |  |
| MSMEG_4400/1-356       | 283 | I D A V P E A V V R R L L T V G H V - N Y E P R L L Q A L N F L Q R T K D R F P W A L D A V P V           | 333 |     |     |  |
| MSMEG_1977/1-341       | 271 | N I D V P T I D V I S T E I N F I G N L V G S Y N D L C D - - L M A L - A A R G A V - - - L H T Q P V     | 316 |     |     |  |

|                        |     |                        |                    |     |
|------------------------|-----|------------------------|--------------------|-----|
|                        |     | 380                    | 390                |     |
| MSMEG_0127_adhE1/1-363 | 339 | ALDDINAGMDLEAEGRAVRQV  | IDFA----           | 363 |
| MSMEG_0217_adhB1/1-374 | 346 | KLEDINSGYQMDLGDGKNIRGV | IKYDESDW-          | 374 |
| MSMEG_1138/1-378       | 353 | PLEEAAAALLDDL          | AGHALRQLLIPSA----  | 378 |
| MSMEG_2317_adhC2/1-349 | 320 | TPDYINEAYERVLASDVRVRF  | VIDTASLRS          | 349 |
| MSMEG_3464/1-338       | 314 | PLDDAAEAYGAMADGRARV    | RVFLTT----         | 338 |
| MSMEG_4340_adhE2/1-363 | 338 | GLDGIEDAFHKMHAGV       | LSRVVVLDR----      | 363 |
| MSMEG_5866_adhB2/1-375 | 347 | RLEQINDGYQDMLEGRNIRGV  | IRYTDADR-          | 375 |
| MSMEG_4400/1-356       | 334 | PLDRIAGLLDAPGPKP-      | RYAVAP-----        | 356 |
| MSMEG_1977/1-341       | 317 | ALDDFQASAITDL          | DNGNVGRGAILVP----- | 341 |

Fig. S1E

|                           |     |         |            |            |         |         |         |        |         |              |
|---------------------------|-----|---------|------------|------------|---------|---------|---------|--------|---------|--------------|
| M.smegmatis_RpsM/1-124    | 1   | MARLVGV | DLPRDKRMEI | ALTYIYGIG  | RTRSNEI | LAATGID | KNMRTKD | LTDDQ  | VTV     | 55           |
| C.glutamicum_RpsM/1-122   | 1   | MARLAGV | DLPRNKRME  | VALTYIYGIG | PARSKQL | LEETG   | ISPDL   | RTDNL  | TDEQIAA | 55           |
| C.diphtheriae_RpsM/1-122  | 1   | MARLAGV | DLPRNKRME  | VALTYIYGIG | PARAAQL | LEETG   | ISPDL   | RTDNL  | TDEQVSA | 55           |
| M.tuberculosis_RpsM/1-124 | 1   | MARLVGV | DLPRDKRME  | VALTYIFGIG | RTRSNEI | LAATGID | DRDLR   | TRDLT  | EEQLIH  | 55           |
| M.smegmatis_RpsM/1-124    | 56  | LRDYIE  | GNLKVEG    | DLRRE      | VQADIR  | RRKIEIG | C*YQGL  | RHRRGL | PVRGQ   | RTKTNARTR110 |
| C.glutamicum_RpsM/1-122   | 56  | LRDVIE  | GTWKVEG    | DLRRQ      | VQADIR  | RRKIEIG | CYQGL   | RHRRGL | PVRGQ   | RTKTNARTR110 |
| C.diphtheriae_RpsM/1-122  | 56  | LRDVIE  | ATWKVEG    | DLRRQ      | VQADIR  | RRKIEIG | CYQGL   | RHRRGL | PVRGQ   | RTKTNARTR110 |
| M.tuberculosis_RpsM/1-124 | 56  | LRDYIE  | ANLKVEG    | DLRRE      | VQADIR  | RRKIEIG | CYQGL   | RHRRGM | PVRGQ   | RTKTNARTR110 |
| M.smegmatis_RpsM/1-124    | 111 | KGPKRT  | IAGKKK     | AR         |         |         |         |        |         | 124          |
| C.glutamicum_RpsM/1-122   | 111 | KGPKKT  | IAGKKK     | -          | -       |         |         |        |         | 122          |
| C.diphtheriae_RpsM/1-122  | 111 | KGPKKT  | IAGKKK     | -          | -       |         |         |        |         | 122          |
| M.tuberculosis_RpsM/1-124 | 111 | KGPKRT  | IAGKKK     | AR         |         |         |         |        |         | 124          |

Fig. S1F

|                           |     |                                                                                                                             |     |           |     |
|---------------------------|-----|-----------------------------------------------------------------------------------------------------------------------------|-----|-----------|-----|
| M.smegmatis_RshA/1-101    | 1   | - - - - -MSETEREDERWT P P I G P I D - - - - -PEHPE                                                                          | CAA | - - - - - | 27  |
| M.tuberculosis_RshA/1-101 | 1   | - - - - -MSENCGPTDAHADHDDSHGGMG                                                                                             | CAE | - - - - - | 25  |
| C.glutamicum_RshA/1-89    | 1   | - - - - -MTNLNRSDSQGDCG                                                                                                     | CPE | - - - - - | 17  |
| M.smegmatis_RseA/1-132    | 1   | - - - - -MADPGHVFRRASFWSLPS - - - - -QFASQSDAPVGAPRQFGSTE                                                                   |     |           | 37  |
| M.tuberculosis_RseA/1-154 | 1   | - - - - -MADPGSVGHVFRRASFWSLPA - - - - -QFASQSDAPVGAPRQFRSTE                                                                |     |           | 40  |
| C.glutamicum_RseA/1-164   | 1   | MFNSDTTANLQAKSRDRAGSKAKRSRPSFDSVAR - - - -DVL DVRTKTAQVKNKAKEFSSVD                                                          |     |           | 57  |
|                           |     |                                                                                                                             |     |           |     |
| M.smegmatis_RshA/1-101    | 28  | - - V I A E V W T L L D G E C T P E T R D K L K Q H L E E C P T C L R H Y G I E E R V K R L I A A K C * S G E K - - A P D S |     |           | 84  |
| M.tuberculosis_RshA/1-101 | 26  | - - V I A E V W T L L D G E C T P E T R E R L R R H L E A C P G C L R H Y G L E E R I K A L I G T K C R G D R - - A P E G   |     |           | 82  |
| C.glutamicum_RshA/1-89    | 18  | - - F F D E M Y Q L L D D Q L S E S A C E R L R I H A A G C P A C Q Q L L E A E S E F R S L L R - K C C C E S - - A P V E   |     |           | 73  |
| M.smegmatis_RseA/1-132    | 38  | H L S V E A I A A F V D G E L R M S A H L R A A H L S L C * P E C * A A E V D A Q S Q A R T A L R E S C P I A I P N S L L G |     |           | 98  |
| M.tuberculosis_RseA/1-154 | 41  | H L S I E A I A A F V D G E L R M N A H L R A A H L S L C A Q C A A E V D D Q S R A R A A L R D S H P I R I P S T L L G     |     |           | 101 |
| C.glutamicum_RseA/1-164   | 58  | H L S A D A A A M F V D N E L S R G A M H R A R L H I V H C A E C R E E I N R Q R E T V D Y L R S E C K N E E V S A P M D   |     |           | 118 |
|                           |     |                                                                                                                             |     |           |     |
| ZAS Motif                 |     |                                                                                                                             |     |           |     |
|                           |     |                                                                                                                             |     |           |     |
| M.smegmatis_RshA/1-101    | 85  | L R E R L R I Q I S R T T I I R G - - - - -                                                                                 |     |           | 101 |
| M.tuberculosis_RshA/1-101 | 83  | L R E R L R L E I R R T T I I R G G P - - - - -                                                                             |     |           | 101 |
| C.glutamicum_RshA/1-89    | 74  | L R Q R I S Y R I R V E H H L E - - - - -                                                                                   |     |           | 89  |
| M.smegmatis_RseA/1-132    | 99  | M L S Q I P - - - - -H R T P E V T P D V S E Q A - - - - -K F A D D P - - - - -T R G R R K R R - -                          |     |           | 132 |
| M.tuberculosis_RseA/1-154 | 102 | L L S E I P - - - - -R C P P E G P S K G S S G G S S Q G P P D G A A A G F G D R F A D G D G G N R G R Q S R V R R          |     |           | 154 |
| C.glutamicum_RseA/1-164   | 119 | L K A R L A S - - L A T E C M P G P - - - G A E N L A M Q - R P E S F V A K V E S - V V R A V R K N Q G R - - - - -         |     |           | 164 |

Fig. S1G

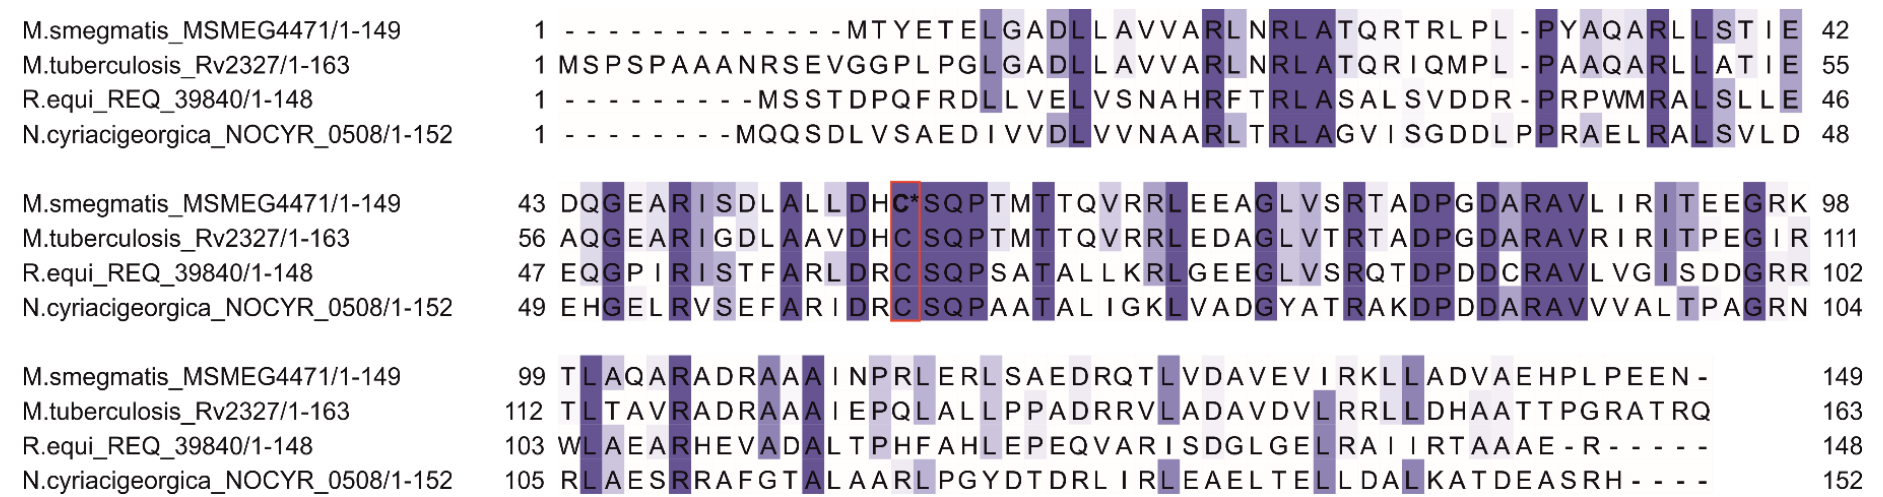

Fig. S1H

|                           |                                                                          |       |
|---------------------------|--------------------------------------------------------------------------|-------|
| M.smegmatis_WhiB1/1-84    | - - - - -                                                                |       |
| M.tuberculosis_Whib1/1-84 | - - - - -                                                                |       |
| C.glutamicum_WhiB1/1-86   | - - - - -                                                                |       |
| M.smegmatis_WhiB2/1-129   | 1 MSYESGDF - DR - - - VVRFDNRL LGSVSHAPH I DTGSTPTGAAGRP - - - - - QLS   | 44    |
| M.tuberculosis_Whib2/1-89 | 1 - - - - -                                                              | MVP 3 |
| C.glutamicum_WhiB2/1-136  | 1 - - MGEKG I FQTCSGTN I PDENRL KV - - - - ALKVRGGRVMEDSAGDVS AKL KAGQTR | 50    |
|                           |                                                                          |       |
| M.smegmatis_WhiB1/1-84    | 1 - - - - - - - - - - MDWRHKAVC* RDE DPEL FFPVGNSGPALAQ I AD AKLV CNRCP  | 41    |
| M.tuberculosis_Whib1/1-84 | 1 - - - - - - - - - - MDWRHKAVC RDE DPEL FFPVGNSGPALAQ I AD AKLV CNRCP   | 41    |
| C.glutamicum_WhiB1/1-86   | 1 - - - - - - - - - - MDWRHEA I C REEDPEL FFPVGNSGPALAQ I AS AKMV CNRCP  | 41    |
| M.smegmatis_WhiB2/1-129   | 45 LVPDSF - DVAPEAEEDQWQERALC* AQT DPEAFFPEKGGs - - - - - TREAKR I CQGCE | 94    |
| M.tuberculosis_Whib2/1-89 | 4 EAPAPFEEPLPPEATDQWQDRALC AQT DPEAFFPEKGGs - - - - - TREAKK I CMGCE     | 54    |
| C.glutamicum_WhiB2/1-136  | 51 TALEMTLDDLFGAVEQEWQEQALC AQT DPEAFFPEKGGs - - - - - TREAKR I CQGCP    | 101   |
|                           |                                                                          |       |
| M.smegmatis_WhiB1/1-84    | 42 VTTEC LSWAL ESGQDAG VWGGM SEDERRAL KRRNARTKARTGV - -                  | 84    |
| M.tuberculosis_Whib1/1-84 | 42 VTTEC LSWAL NTGQDSG VWGGM SEDERRAL KRRNARTKARTGV - -                  | 84    |
| C.glutamicum_WhiB1/1-86   | 42 VTSQC LAWAL ETGQDAG VWGGM SEDERRAL KRRKNRGRGRAR I AV                  | 86    |
| M.smegmatis_WhiB2/1-129   | 95 VRDAC* LEYAL AHDERFG I WGGL SERERRRL KRG I I - - - - -                | 129   |
| M.tuberculosis_Whib2/1-89 | 55 VRHEC LEYAL AHDERFG I WGGL SERERRRL KRG I I - - - - -                 | 89    |
| C.glutamicum_WhiB2/1-136  | 102 VRDEC LEFAL EHDERFG I WGGL SERERRRL KRE I S - - - - -                | 136   |

# Figure S2

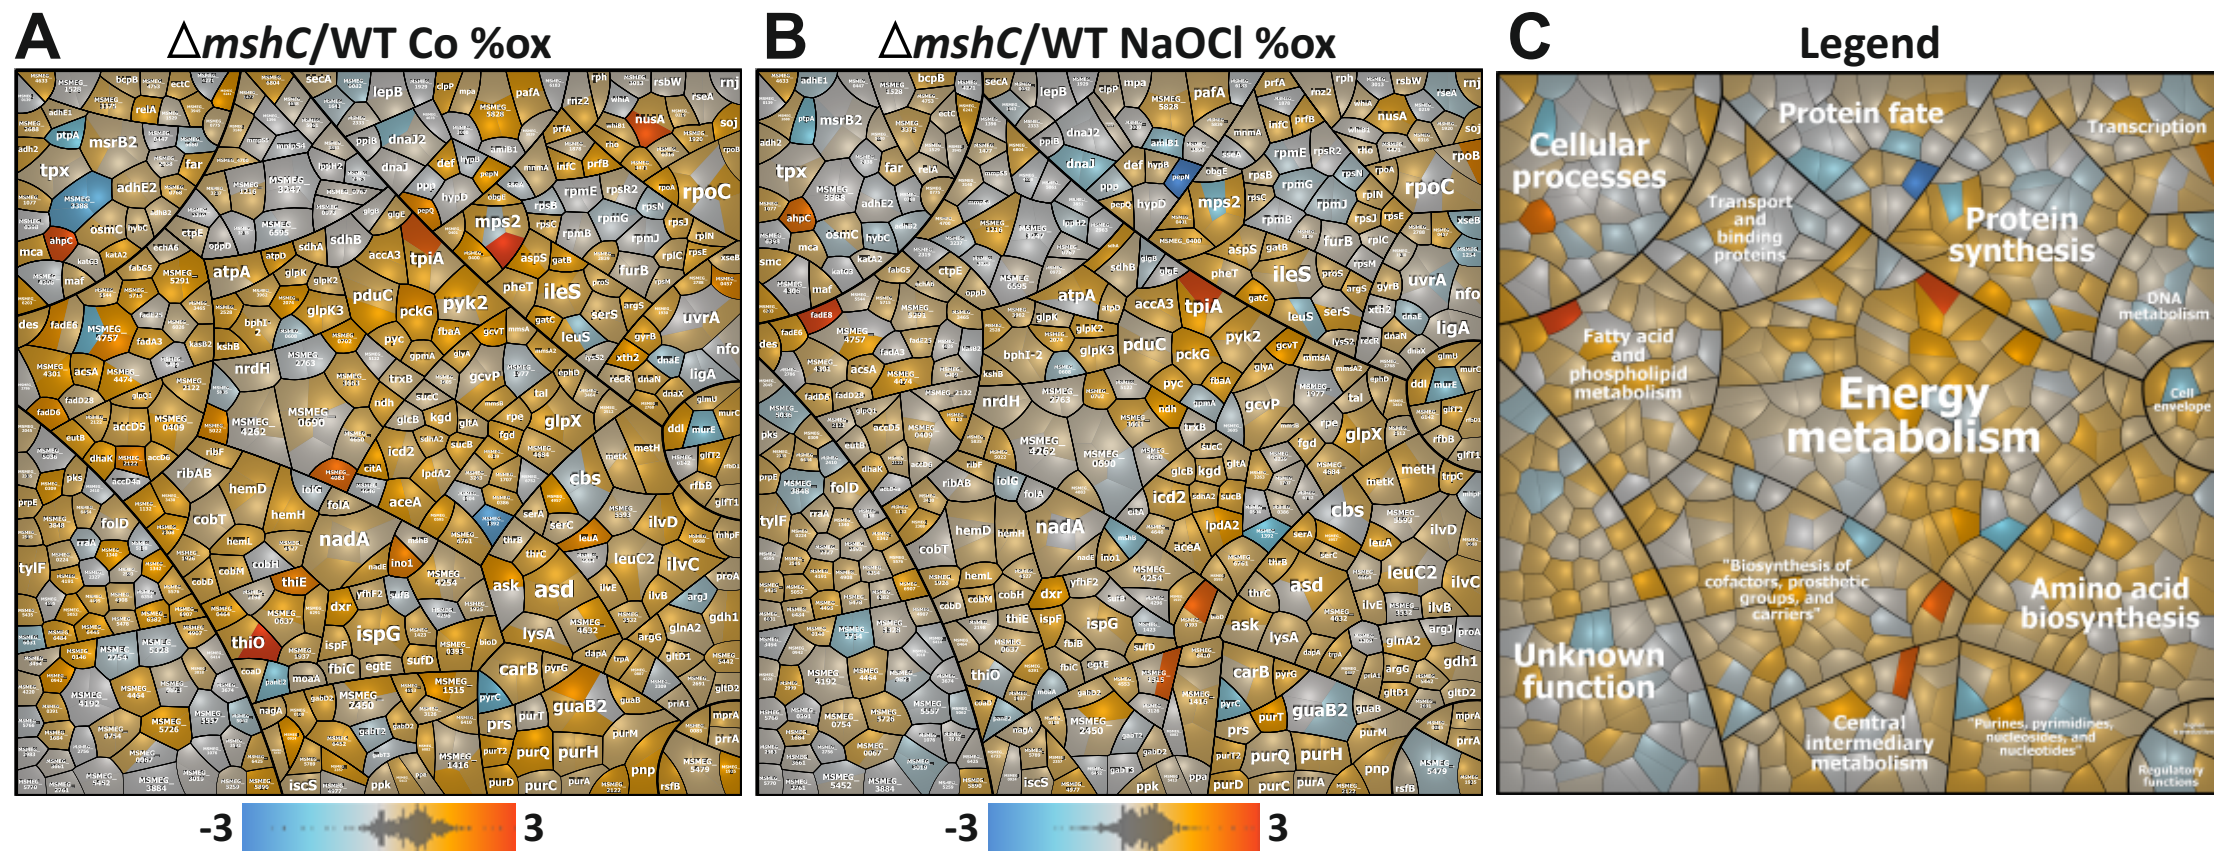

**Fig. S2.** Differential Voronoi redox treemaps for comparison of the thiol-oxidation level between the *M. smegmatis* wild type and the *mshC* mutant. The Voronoi redox treemaps visualize the log<sub>2</sub> fold-change of the percentages of thiol-oxidations in the *mshC* mutant versus the wild type under control (A) and NaOCl stress conditions (B). The increased basal level oxidation in the *mshC* mutant control (A) is shown by the blue-yellow-red color gradient ranging from log<sub>2</sub> fold-change oxidation of -3 to +3. The treemap in (C) is used as legend for the functional classification of the proteins displayed in (B). The treemaps were generated using the Paver software (Decodon) and proteins were classified according to the *M. smegmatis* TIGRfam annotation. The treemap results indicate that MSH is required to maintain the reduced state of the majority of protein thiols in *M. smegmatis*.
